# Supplementary material
Source: MDPI journal article supplement (https://www.mdpi.com/2073-4441/13/24/3530)
Supplement: s1 [file s1]

**Table S1.** Fish length-mass equations from the National Fish Populations Database (Environment Agency, UK). Individual wet body mass (g),  $y$ , is estimated from body length (mm) measurements,  $x$ , using the formula:  $y = a \cdot (x^b)$ .

| Common name           | Species                       | Lw Factor Name                                 | $a$        | $b$    |
|-----------------------|-------------------------------|------------------------------------------------|------------|--------|
| Barbel                | <i>Barbus barbus</i>          | Anglian FDPS / AN Default                      | 0.00004862 | 2.7810 |
| Chub                  | <i>Leuciscus cephalus</i>     | Anglian FDPS / AN Default                      | 0.00002606 | 2.8842 |
| Dace                  | <i>Leuciscus leuciscus</i>    | Anglian FDPS / AN Default                      | 0.00000984 | 3.0457 |
| Common carp varieties | <i>Cyprinus carpio</i>        | Anglian FDPS (Common (wild) carp) / AN Default | 0.00006245 | 2.8462 |
| Gudgeon               | <i>Gobio gobio</i>            | Anglian FDPS / AN Default                      | 0.00003327 | 2.8038 |
| Roach                 | <i>Rutilus rutilus</i>        | Anglian FDPS / AN Default                      | 0.00000288 | 3.3495 |
| Perch                 | <i>Perca fluviatilis</i>      | Anglian FDPS / AN Default                      | 0.00000352 | 3.3072 |
| European eel          | <i>Anguilla anguilla</i>      | ANEAKE Dec 2002 Standard                       | 0.00000078 | 3.1419 |
| 3-spined stickleback  | <i>Gasterosteus aculeatus</i> | Anglian FDPS / AN Default                      | 0.00091759 | 1.9527 |
| Minnow                | <i>Phoxinus phoxinus</i>      | Anglian FDPS / AN Default                      | 0.00000027 | 3.7585 |
| Stone loach           | <i>Barbatula barbatula</i>    | Anglian FDPS / AN Default                      | 0.00000027 | 3.7585 |
| Flounder              | <i>Platichthys flesus</i>     | ANEAKE Oct 1994 Standard / AN Default          | 0.00003168 | 2.7888 |

**Table S2.** Comparison of macroinvertebrate density between treatment reaches (Restored and Control) prior to restoration.

| Response                          | Estimated difference from 'Control' | Std. Error | df    | t value | P value |
|-----------------------------------|-------------------------------------|------------|-------|---------|---------|
| Log <sub>10</sub> (total density) | 0.03                                | 0.08       | 37.00 | 0.35    | 0.726   |
| Log <sub>10</sub> (ARMI)          | -0.13                               | 0.10       | 38.00 | -1.29   | 0.204   |
| Log <sub>10</sub> (EPT)           | -0.07                               | 0.09       | 38.00 | -0.73   | 0.469   |

**Table S3** Contrasts from linear-mixed effects models testing differences in macroinvertebrate density with restoration over the 5 year post-restoration monitoring period.

| Group         | Contrast                  | Difference | Std. Error | t value | P value |
|---------------|---------------------------|------------|------------|---------|---------|
| Total density | Year 1:Restored - Control | 0.02       | 0.10       | 0.21    | 0.9999  |
| Total density | Year 2:Restored - Control | 0.29       | 0.10       | 3.04    | 0.0116  |
| Total density | Year 3:Restored - Control | 0.38       | 0.10       | 3.92    | 0.0004  |
| Total density | Year 4:Restored - Control | 0.39       | 0.10       | 4.10    | 0.0002  |
| Total density | Year 5:Restored - Control | 0.20       | 0.10       | 2.05    | 0.1851  |
| ARMI          | Year 1:Restored - Control | 0.38       | 0.14       | 2.71    | 0.0334  |
| ARMI          | Year 2:Restored - Control | 0.48       | 0.14       | 3.38    | 0.0037  |
| ARMI          | Year 3:Restored - Control | 0.32       | 0.14       | 2.24    | 0.1184  |
| ARMI          | Year 4:Restored - Control | 0.54       | 0.14       | 3.87    | 0.0005  |
| ARMI          | Year 5:Restored - Control | 0.50       | 0.14       | 3.54    | 0.0020  |
| EPT           | Year 1:Restored - Control | 0.45       | 0.14       | 3.30    | 0.0048  |
| EPT           | Year 2:Restored - Control | 0.45       | 0.14       | 3.27    | 0.0054  |
| EPT           | Year 3:Restored - Control | 0.33       | 0.14       | 2.43    | 0.0742  |
| EPT           | Year 4:Restored - Control | 0.59       | 0.14       | 4.27    | 0.0001  |
| EPT           | Year 5:Restored - Control | 0.49       | 0.14       | 3.59    | 0.0017  |
| Amphipoda     | Year 1:Restored - Control | 0.15       | 0.12       | 1.22    | 0.7143  |
| Amphipoda     | Year 2:Restored - Control | 0.31       | 0.12       | 2.59    | 0.0467  |
| Amphipoda     | Year 3:Restored - Control | 0.15       | 0.12       | 1.22    | 0.7157  |
| Amphipoda     | Year 4:Restored - Control | 0.27       | 0.12       | 2.21    | 0.1275  |
| Amphipoda     | Year 5:Restored - Control | 0.38       | 0.12       | 3.15    | 0.0082  |
| Asellidae     | Year 1:Restored - Control | 0.14       | 0.13       | 1.06    | 0.8187  |
| Asellidae     | Year 2:Restored - Control | 0.40       | 0.13       | 3.04    | 0.0119  |
| Asellidae     | Year 3:Restored - Control | 0.43       | 0.13       | 3.30    | 0.0048  |

|                      |                           |       |      |       |        |
|----------------------|---------------------------|-------|------|-------|--------|
| Asellidae            | Year 4:Restored - Control | 0.32  | 0.13 | 2.43  | 0.0740 |
| Asellidae            | Year 5:Restored - Control | 0.34  | 0.13 | 2.59  | 0.0473 |
| Bivalvia             | Year 1:Restored - Control | 0.00  | 0.05 | 0.00  | 1.0000 |
| Bivalvia             | Year 2:Restored - Control | 0.05  | 0.05 | 0.99  | 0.8582 |
| Bivalvia             | Year 3:Restored - Control | 0.00  | 0.05 | 0.00  | 1.0000 |
| Bivalvia             | Year 4:Restored - Control | -0.05 | 0.05 | -1.03 | 0.8379 |
| Bivalvia             | Year 5:Restored - Control | 0.03  | 0.05 | 0.66  | 0.9718 |
| Cased.Trichoptera    | Year 1:Restored - Control | 0.24  | 0.07 | 3.44  | 0.0029 |
| Cased.Trichoptera    | Year 2:Restored - Control | -0.05 | 0.07 | -0.78 | 0.9422 |
| Cased.Trichoptera    | Year 3:Restored - Control | -0.04 | 0.07 | -0.60 | 0.9812 |
| Cased.Trichoptera    | Year 4:Restored - Control | 0.00  | 0.07 | 0.00  | 1.0000 |
| Cased.Trichoptera    | Year 5:Restored - Control | -0.05 | 0.07 | -0.71 | 0.9609 |
| Caseless.Trichoptera | Year 1:Restored - Control | 0.00  | 0.13 | 0.00  | 1.0000 |
| Caseless.Trichoptera | Year 2:Restored - Control | 0.34  | 0.13 | 2.61  | 0.0448 |
| Caseless.Trichoptera | Year 3:Restored - Control | 0.21  | 0.13 | 1.59  | 0.4487 |
| Caseless.Trichoptera | Year 4:Restored - Control | 0.62  | 0.13 | 4.73  | 0.0000 |
| Caseless.Trichoptera | Year 5:Restored - Control | 0.65  | 0.13 | 4.97  | 0.0000 |
| Chironomidae         | Year 1:Restored - Control | -0.21 | 0.10 | -2.06 | 0.1821 |
| Chironomidae         | Year 2:Restored - Control | -0.01 | 0.10 | -0.09 | 1.0000 |
| Chironomidae         | Year 3:Restored - Control | -0.04 | 0.10 | -0.42 | 0.9962 |
| Chironomidae         | Year 4:Restored - Control | 0.04  | 0.10 | 0.37  | 0.9979 |
| Chironomidae         | Year 5:Restored - Control | 0.08  | 0.10 | 0.81  | 0.9328 |
| Ephemeroptera        | Year 1:Restored - Control | 0.36  | 0.11 | 3.33  | 0.0044 |
| Ephemeroptera        | Year 2:Restored - Control | 0.30  | 0.11 | 2.70  | 0.0344 |
| Ephemeroptera        | Year 3:Restored - Control | 0.29  | 0.11 | 2.61  | 0.0446 |
| Ephemeroptera        | Year 4:Restored - Control | 0.01  | 0.11 | 0.06  | 1.0000 |
| Ephemeroptera        | Year 5:Restored - Control | -0.03 | 0.11 | -0.32 | 0.9990 |

|             |                           |       |      |       |        |
|-------------|---------------------------|-------|------|-------|--------|
| Gastropoda  | Year 1:Restored - Control | 0.00  | 0.09 | 0.00  | 1.0000 |
| Gastropoda  | Year 2:Restored - Control | 0.02  | 0.09 | 0.25  | 0.9997 |
| Gastropoda  | Year 3:Restored - Control | 0.00  | 0.09 | 0.00  | 1.0000 |
| Gastropoda  | Year 4:Restored - Control | 0.07  | 0.09 | 0.72  | 0.9579 |
| Gastropoda  | Year 5:Restored - Control | -0.30 | 0.09 | -3.15 | 0.0082 |
| Hirudinea   | Year 1:Restored - Control | 0.09  | 0.09 | 0.99  | 0.8574 |
| Hirudinea   | Year 2:Restored - Control | 0.25  | 0.09 | 2.69  | 0.0353 |
| Hirudinea   | Year 3:Restored - Control | 0.23  | 0.09 | 2.45  | 0.0696 |
| Hirudinea   | Year 4:Restored - Control | 0.06  | 0.09 | 0.67  | 0.9690 |
| Hirudinea   | Year 5:Restored - Control | 0.09  | 0.09 | 0.93  | 0.8854 |
| Oligochaeta | Year 1:Restored - Control | -0.17 | 0.14 | -1.18 | 0.7423 |
| Oligochaeta | Year 2:Restored - Control | 0.14  | 0.14 | 0.94  | 0.8811 |
| Oligochaeta | Year 3:Restored - Control | 0.07  | 0.14 | 0.51  | 0.9908 |
| Oligochaeta | Year 4:Restored - Control | 0.21  | 0.14 | 1.45  | 0.5489 |
| Oligochaeta | Year 5:Restored - Control | 0.47  | 0.14 | 3.30  | 0.0047 |
| Plecoptera  | Year 1:Restored - Control | 0.03  | 0.06 | 0.48  | 0.9935 |
| Plecoptera  | Year 2:Restored - Control | 0.00  | 0.06 | 0.00  | 1.0000 |
| Plecoptera  | Year 3:Restored - Control | 0.12  | 0.06 | 1.96  | 0.2279 |
| Plecoptera  | Year 4:Restored - Control | 0.07  | 0.06 | 1.15  | 0.7661 |
| Plecoptera  | Year 5:Restored - Control | 0.02  | 0.06 | 0.34  | 0.9987 |
| Simuliidae  | Year 1:Restored - Control | 0.17  | 0.11 | 1.65  | 0.4030 |
| Simuliidae  | Year 2:Restored - Control | 0.34  | 0.11 | 3.23  | 0.0062 |
| Simuliidae  | Year 3:Restored - Control | 0.53  | 0.11 | 5.02  | 0.0000 |
| Simuliidae  | Year 4:Restored - Control | 0.00  | 0.11 | 0.00  | 1.0000 |
| Simuliidae  | Year 5:Restored - Control | 0.06  | 0.11 | 0.56  | 0.9859 |
| Zygoptera   | Year 1:Restored - Control | 0.00  | 0.02 | 0.00  | 1.0000 |
| Zygoptera   | Year 2:Restored - Control | 0.00  | 0.02 | 0.00  | 1.0000 |

|               |                           |       |      |       |        |
|---------------|---------------------------|-------|------|-------|--------|
| Zygoptera     | Year 3:Restored - Control | 0.02  | 0.02 | 0.75  | 0.9515 |
| Zygoptera     | Year 4:Restored - Control | 0.00  | 0.02 | 0.00  | 1.0000 |
| Zygoptera     | Year 5:Restored - Control | 0.01  | 0.02 | 0.31  | 0.9991 |
| Miscellaneous | Year 1:Restored - Control | 0.01  | 0.08 | 0.13  | 1.0000 |
| Miscellaneous | Year 2:Restored - Control | -0.01 | 0.08 | -0.10 | 1.0000 |
| Miscellaneous | Year 3:Restored - Control | -0.03 | 0.08 | -0.38 | 0.9979 |
| Miscellaneous | Year 4:Restored - Control | 0.13  | 0.08 | 1.51  | 0.5022 |
| Miscellaneous | Year 5:Restored - Control | -0.05 | 0.08 | -0.55 | 0.9877 |

**Table S4.** Condition assessment of invertebrate assemblages based on the BMWP (Biological Monitoring Working Party) scores. The score for each family present is totalled to give a site score. Because these site BMWP scores are influenced by sample size (a high score can be achieved through a large number of low scoring families as well as a small number of high scoring families) an Average Score Per Taxa (ASPT) is also calculated from the resulting BMWP scores and allows further interpretation of the results. The higher the ASPT, the greater the proportion of more sensitive families in the sample and therefore the better the site condition.

| Period | Reach          | BMWP | ASPT | Contributing taxa | Status   |
|--------|----------------|------|------|-------------------|----------|
| Before | Upper-Control  | 99   | 4.5  | 22                | Moderate |
|        | Upper-Restored | 74   | 4.11 | 18                | Moderate |
|        | Lower-Restored | 92   | 4.18 | 22                | Moderate |
|        | Lower-Control  | 90   | 4.09 | 22                | Moderate |
| After  | Upper-Control  | 87   | 4.35 | 26                | Moderate |
|        | Upper-Restored | 104  | 4.52 | 23                | Good/mod |
|        | Lower-Restored | 105  | 4.57 | 26                | Good/mod |
|        | Lower-Control  | 121  | 4.65 | 24                | Good/mod |

**Table S5.** Summary output from linear-mixed effects modeling testing for differences in species body mass with restoration.

| Common name | Species             | Estimated difference from 'Control' | Std. Error | chisq   | df    | P value              |
|-------------|---------------------|-------------------------------------|------------|---------|-------|----------------------|
| Eel         | Anguilla anguilla   | 0.19                                | 0.08       | 143.80  | 2.353 | 0.0200               |
| Stone loach | Barbatula barbatula | 0.02                                | 0.02       | 412.82  | 0.815 | 0.4160               |
| Gudgeon     | Gobio gobio         | 0.00                                | 0.10       | 68.77   | 0.04  | 0.9681               |
| Chub        | Leuciscus cephalus  | 0.54                                | 0.06       | 719.13  | 9.435 | <2×10 <sup>-16</sup> |
| Minnow      | Phoxinus phoxinus   | 0.05                                | 0.02       | 1940.00 | 2.112 | 0.0348               |

**Table S6.** Summary output from LME models testing for the effects of restoration on macroinvertebrate density across the 6 year monotrining period.

| log10(total density) | Estimate | Std. Error | df     | t value | P value  |
|----------------------|----------|------------|--------|---------|----------|
| (Intercept)          | 3.09     | 0.07       | 114.00 | 46.55   | < 0.0001 |
| periodYear1          | 0.02     | 0.09       | 114.00 | 0.26    | 0.7972   |
| periodYear2          | -0.06    | 0.09       | 114.00 | -0.62   | 0.5347   |
| periodYear3          | -0.33    | 0.09       | 114.00 | -3.56   | 0.0005   |
| periodYear4          | -0.72    | 0.09       | 114.00 | -7.67   | < 0.0001 |
| periodYear5          | -0.36    | 0.09       | 114.00 | -3.86   | 0.0002   |
| log10(ARMI+ 1)       | Estimate | Std. Error | df     | t value | P value  |
| (Intercept)          | 1.68     | 0.09       | 23.95  | 17.81   | < 0.0001 |
| periodYear1          | 0.22     | 0.13       | 113.00 | 1.69    | 0.0933   |
| periodYear2          | 0.44     | 0.13       | 113.00 | 3.33    | 0.0012   |
| periodYear3          | 0.22     | 0.13       | 113.00 | 1.68    | 0.0949   |
| periodYear4          | 0.12     | 0.13       | 113.00 | 0.92    | 0.3597   |
| periodYear5          | 0.23     | 0.13       | 113.00 | 1.75    | 0.0832   |
| log10(EPT + 1)       | Estimate | Std. Error | df     | t value | P value  |

|             |      |      |        |       |          |
|-------------|------|------|--------|-------|----------|
| (Intercept) | 1.52 | 0.09 | 113.97 | 16.73 | < 0.0001 |
| periodYear1 | 0.20 | 0.13 | 114.00 | 1.56  | 0.1225   |
| periodYear2 | 0.51 | 0.13 | 114.00 | 3.95  | 0.0001   |
| periodYear3 | 0.16 | 0.13 | 114.00 | 1.25  | 0.2154   |
| periodYear4 | 0.12 | 0.13 | 114.00 | 0.94  | 0.3469   |
| periodYear5 | 0.29 | 0.13 | 114.00 | 2.28  | 0.0247   |

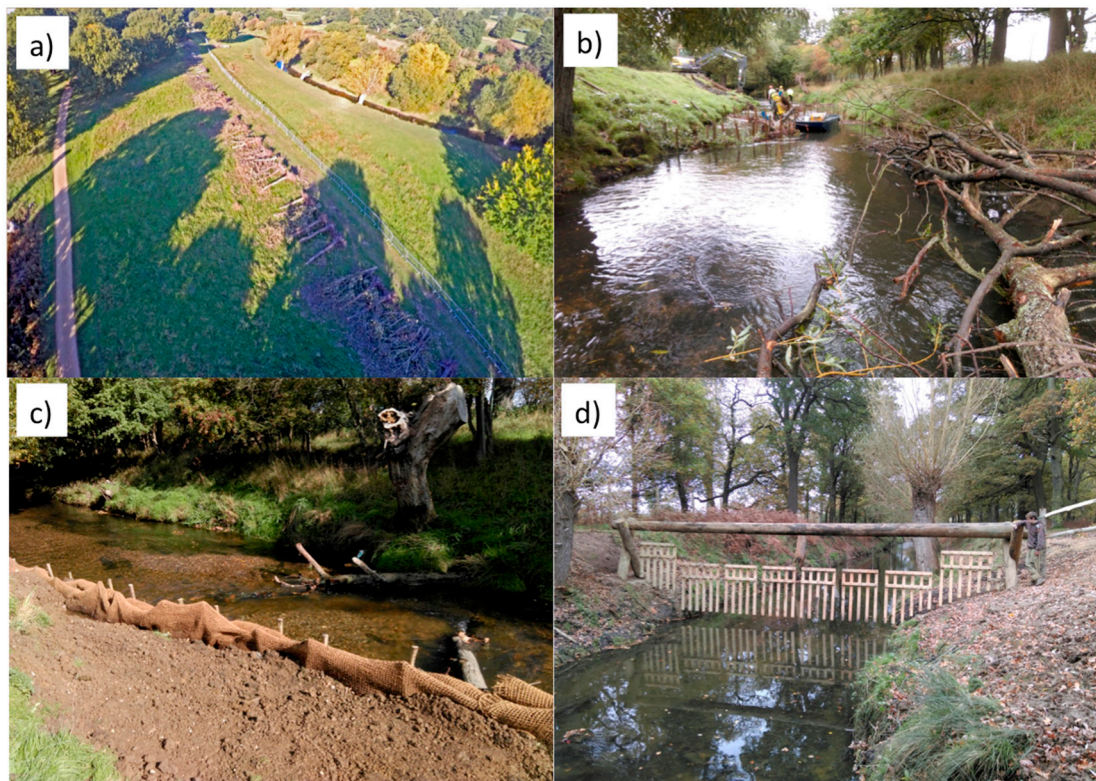

**Figure S1.** Beverley Brook restoration work. a) Some of the Large woody material (LWM) stockpile seen from the air; b) Tree tops and brash in the foreground before being compressed and secured; c) LWM immediately forming holes, shoals and riffles and d) river gates stopping deer access and marking the end of the restored section of the river.



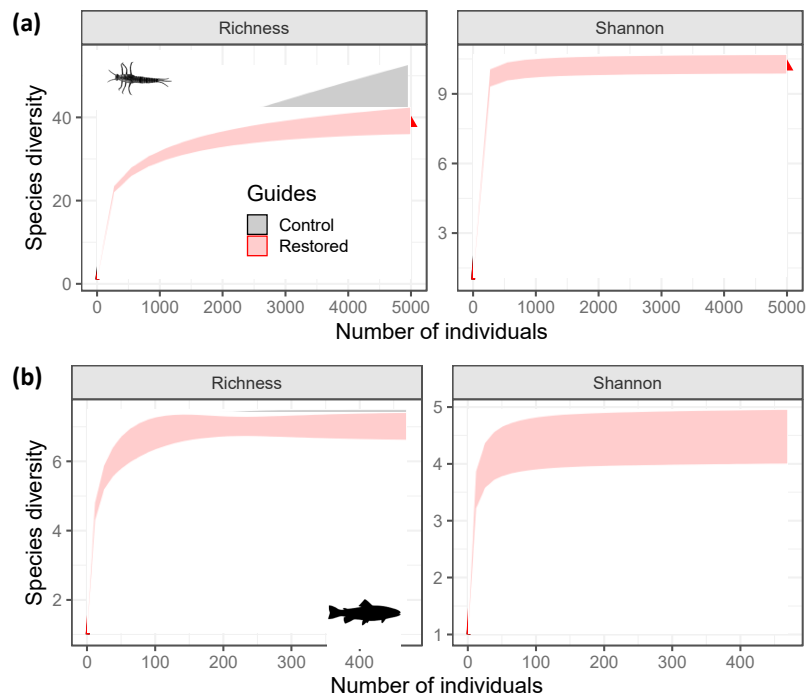

**Figure S2.** Species richness and Shannon diversity rarefaction (solid line segment) and extrapolation (dotted line segments) sampling curves between treatments for macroinvertebrate (a) and fish (b) assemblages pre-restoration (2015). Shaded areas indicate 95% confidence intervals and solid dots/triangles represent the reference samples.

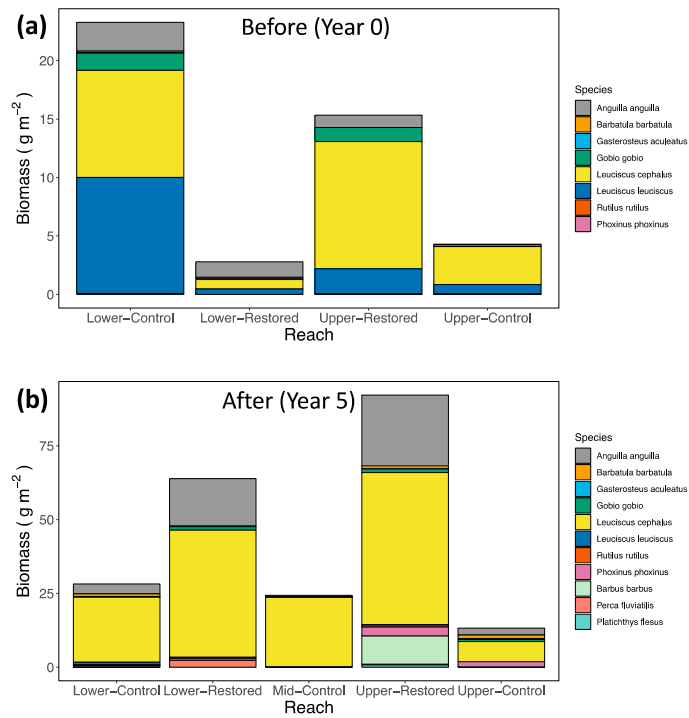

**Figure S3.** Fish biomass estimates for each monitoring reach before (a) and 5-years after (b) restoration.

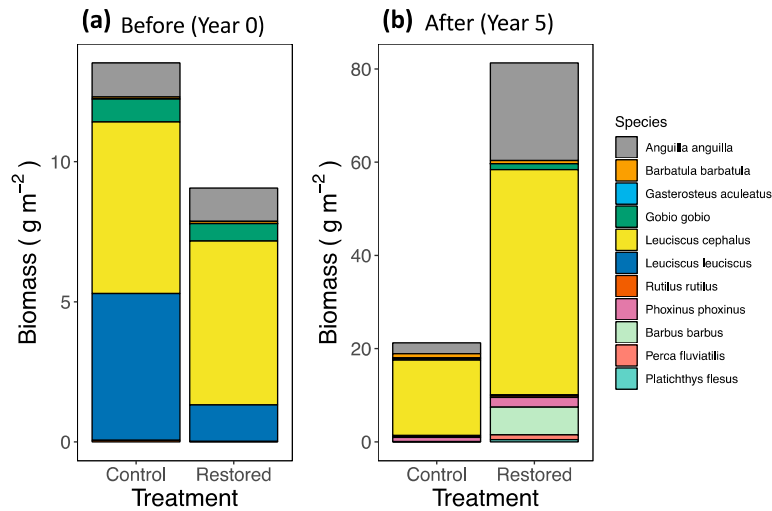

**Figure S4.** Fish biomass estimates (per unit stream area) between treatments before (a) and 5-years after (b) restoration.

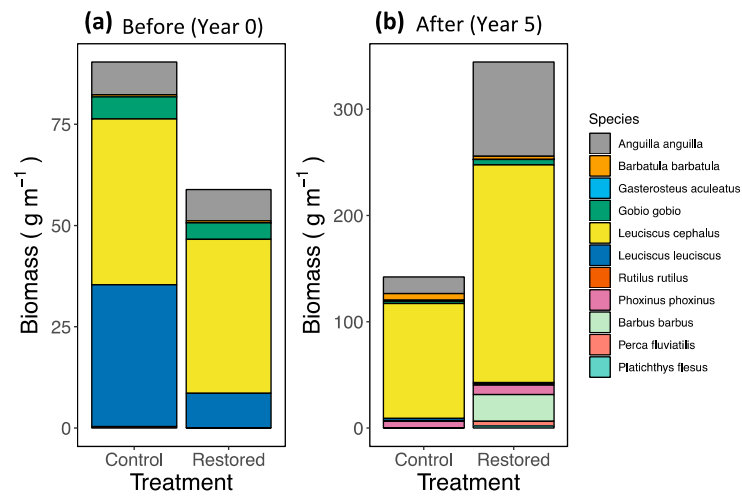

**Figure S5.** Fish biomass estimates (per unit stream length) between treatments before (a) and 5-years after (b) restoration.

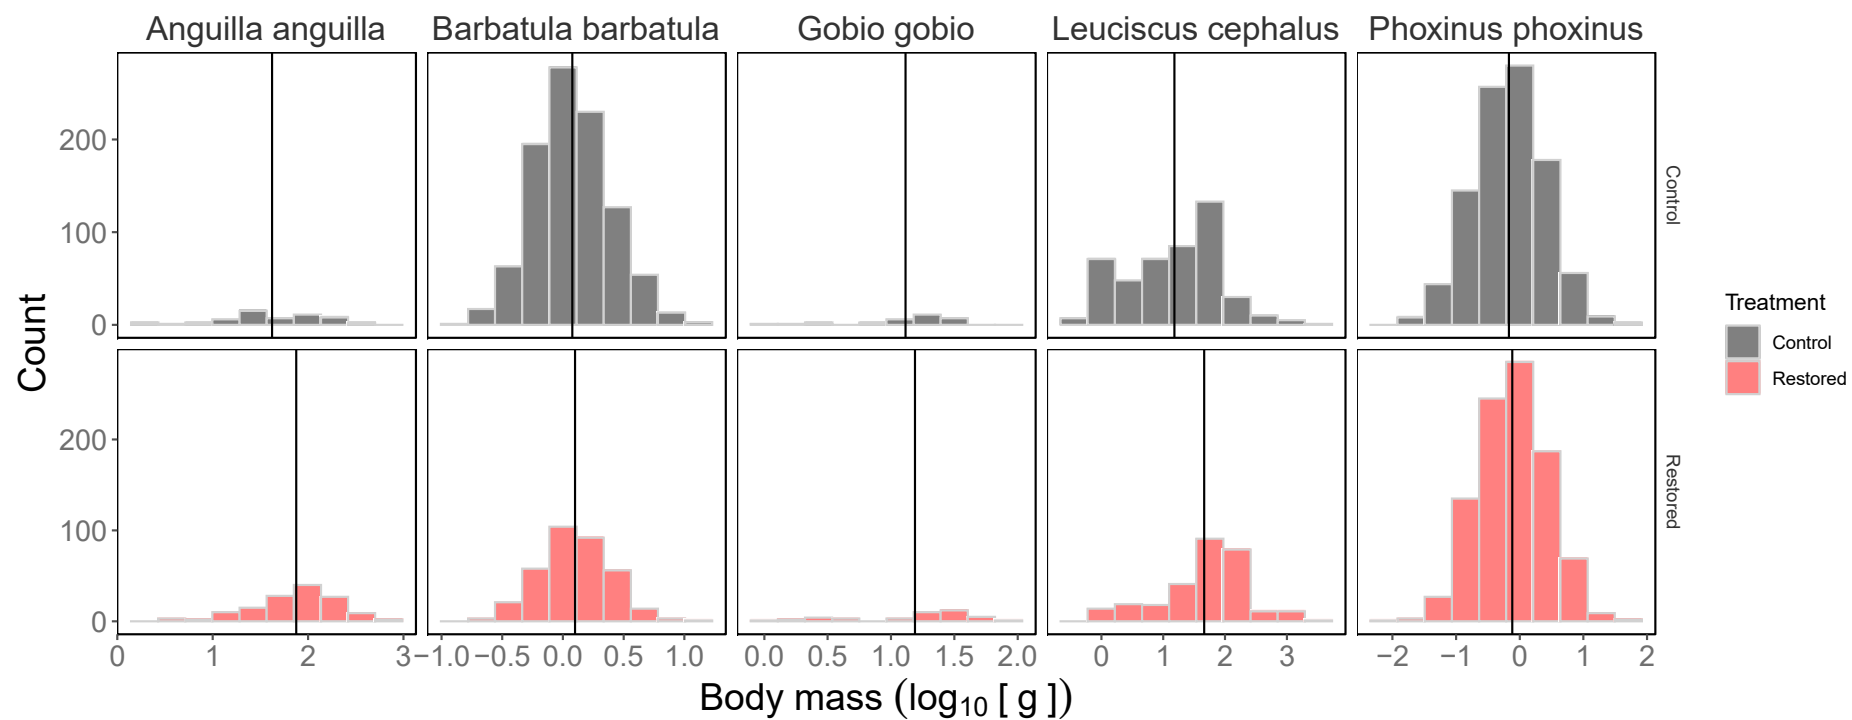

**Figure S6.** Fish body mass distributions between treatments 5-years after restoration. The solid lines denotes the mean body mass.

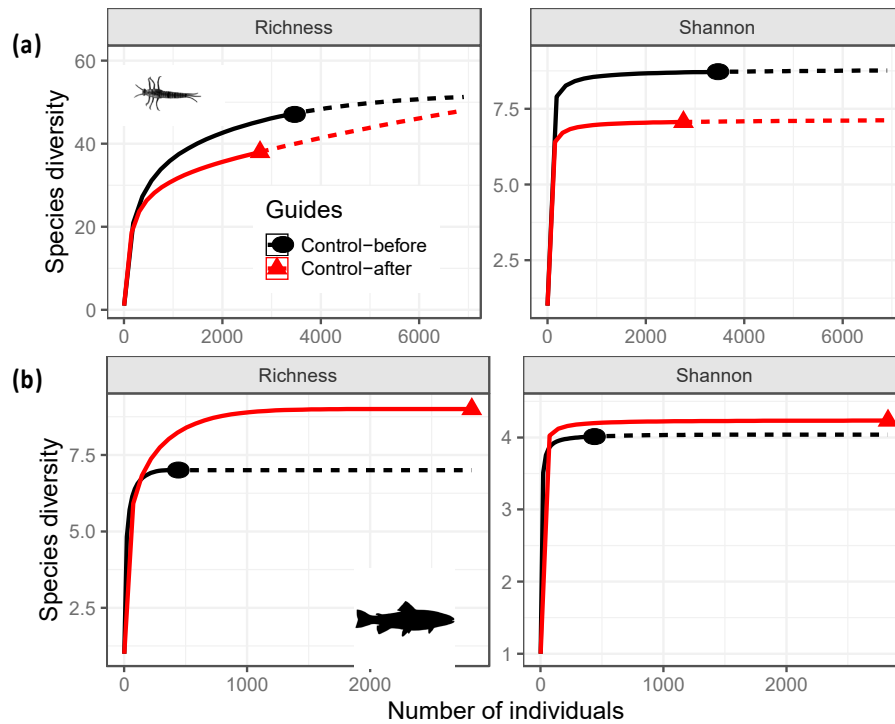

**Figure S7.** Species richness and Shannon diversity rarefaction (solid line segment) and extrapolation (dotted line segments) sampling curves for macroinvertebrate (a) and fish (b) assemblages for control reaches pre- and post-restoration. Shaded areas indicate 95% confidence intervals and solid dots/triangles represent the reference samples.
